# Supplementary material for: Quinine as a highly responsive chiral sensor for the 1H and 19F NMR enantiodiscrimination of N-trifluoroacetyl amino acids with free carboxyl functions
Source: Royal Society of Chemistry journal article supplement (doi:10.1039/d2an00166g), 2022-01-01
Supplement: d2an00166g1.pdf [file d2an00166g1.pdf]

# Quinine as Highly Responsive Chiral Sensor for the $^1\text{H}$ and $^{19}\text{F}$ NMR Enantiodiscrimination of *N*-Trifluoroacetyl Amino Acids with Free Carboxyl Functions

Alessandra Recchimurzo, Fabio Maccabruni, Gloria Uccello Barretta,\* Federica Balzano

Department of Chemistry and Industrial Chemistry, University of Pisa, via Moruzzi 13, 56124 Pisa, Italy.

\*gloria.uccello.barretta@unipi.it

## Supplementary Information

Table S1. Nonequivalences of **1-10** at 60 mM and 5 mM in the presence of **Qui** in  $\text{CDCl}_3$  or  $\text{C}_6\text{D}_6$

Table S2. Comparison of ee (%) of (*R*)-**3** determined by gravimetric data and by NMR integration in equimolar mixtures **3/Qui** (60 mM) in  $\text{C}_6\text{D}_6$

Figure S1. Comparison of  $^1\text{H}$  NMR (600 MHz, 25 °C,  $\text{C}_6\text{D}_6$ ) spectral regions corresponding to *NH* proton of racemic **3** in equimolar **3/Qui** mixture at variable concentrations

Figure S2. Comparison of  $^{19}\text{F}$  NMR (564 MHz, 25 °C,  $\text{C}_6\text{D}_6$ ) spectra of racemic **3** in equimolar **3/Qui** mixture at variable concentrations

Table S3.  $^1\text{H}$  NMR chemical shifts of H1 and H2 protons of **Qui** at variable concentration in the presence of **3** (15 mM) in  $\text{C}_6\text{D}_6$

Figure S3. Schematic representation of **Qui** in the open-like conformation

Table S4. Comparison of ee (%) determined by gravimetric data and by integration of  $^{19}\text{F}$  NMR signals of the two amino acids mixtures analysed in  $\text{C}_6\text{D}_6$  and  $\text{CDCl}_3$

Figure S4. Absolute errors of ee in the determination of ee by NMR integration of *N*-TFA-amino acid derivatives in mixtures

Figure S5. Stoichiometry determination

Figure S6. Association constants determination

Figure S7. 1D ROESY spectra

Figure S8. *N*-TFA-amino acid derivatives **1-10** with numbered protons

NMR characterization of **1-10** and **Qui**

**Table S1.** Nonequivalence ( $\Delta\Delta\delta=|\Delta\delta_R-\Delta\delta_S|$ , ppm) data of **1-10** at 60 mM and 5 mM (in parenthesis) in the presence of one equivalent (for **1-7, 9, 10**) or two equivalents (for **8**) of **Qui** in  $\text{CDCl}_3$  or  $\text{C}_6\text{D}_6$ .

| substrate  | $\Delta\Delta\delta$ (ppm) |                              |                               |                              |
|------------|----------------------------|------------------------------|-------------------------------|------------------------------|
|            | NH                         | CH $\alpha$                  | CH <sub>3</sub>               | CF <sub>3</sub>              |
| <b>1*</b>  | 0.038<br>(0.013)           | 0.020<br>(0.011)             | 0.015<br>(0.008)              | 0.015<br>(0.006)             |
| <b>2*</b>  | 0.020<br>(0.015)           | 0.004<br>(0.006)             | 0.010/0.022<br>(0.013/0.018)  | 0.033<br>(0.011)             |
| <b>3</b>   | 0.210 (0.058)              | 0.007 (0.004)                | 0.026/0.011<br>(0.0027/0.020) | 0.089<br>(0.009)             |
| <b>3*</b>  | 0.041                      | 0.008                        | 0.016/0.023                   | 0.032                        |
| <b>4</b>   | 0.183<br>(0.088)           | 0.028<br>(-)                 | 0.036<br>(0.034)              | 0.082<br>(0.040)             |
| <b>4*</b>  | 0.035                      | 0.008                        | 0.017                         | 0.023                        |
| <b>5</b>   | 0.964<br>(1.230)           | 0.329<br>(0.374)             |                               | 0.065<br>(0.103)             |
| <b>5*</b>  | 0.533                      | 0.267                        |                               | 0.057                        |
| <b>6</b>   | 0.201<br>(0.056)           | 0.084<br>(0.010)             |                               | 0.052<br>(-)                 |
| <b>6*</b>  | 0.032                      | 0.001                        | -                             | 0.008                        |
| <b>7</b>   | 0.169<br>(0.070)           | 0.006<br>(0.005)             | 0.029<br>(0.030)              | 0.090<br>(0.025)             |
| <b>7*</b>  | 0.034                      | 0.011                        | 0.004                         | 0.032                        |
| <b>8*</b>  | 1.302<br>(1.090)           | 0.012<br>(0.024)             |                               | 0.156<br>(0.114)             |
| <b>9</b>   |                            | 0.108/0.066<br>(0.037/0.038) |                               | 0.047/0.057<br>(0.037/0.081) |
| <b>9*</b>  |                            | 0.029/0.032                  |                               | 0.037/0.064                  |
| <b>10*</b> | 0.025<br>(0.081)           | 0.047<br>(0.004)             |                               | -<br>(0.004)                 |

\*NMR analysis carried out in  $\text{CDCl}_3$

**Table S2.** Comparison of ee (%) of (*R*)-**3** determined by gravimetric data and by integration of <sup>1</sup>H and <sup>19</sup>F NMR signals of **3** (60 mM) in equimolar mixtures **3/Qui** in C<sub>6</sub>D<sub>6</sub>. The corresponding absolute error is also reported.

| ee by gravimetric data (%) | ee by NMR integration (%) | absolute error |
|----------------------------|---------------------------|----------------|
| 98.94                      | 99.26                     | 0.32           |
| 89.86                      | 89.3                      | 0.56           |
| 80.30                      | 79.64                     | 0.66           |
| 59.86                      | 59.5                      | 0.36           |
| 40.42                      | 40.72                     | 0.30           |
| 19.94                      | 20.16                     | 0.22           |
| 0.38                       | 0.92                      | 0.54           |
| -20.16                     | -19.76                    | 0.40           |
| -39.92                     | -39.54                    | 0.38           |
| -60.18                     | -60.64                    | 0.46           |
| -79.94                     | -80.44                    | 0.50           |
| -89.8                      | -90.36                    | 0.56           |
| -99.8                      | -99.24                    | 0.56           |

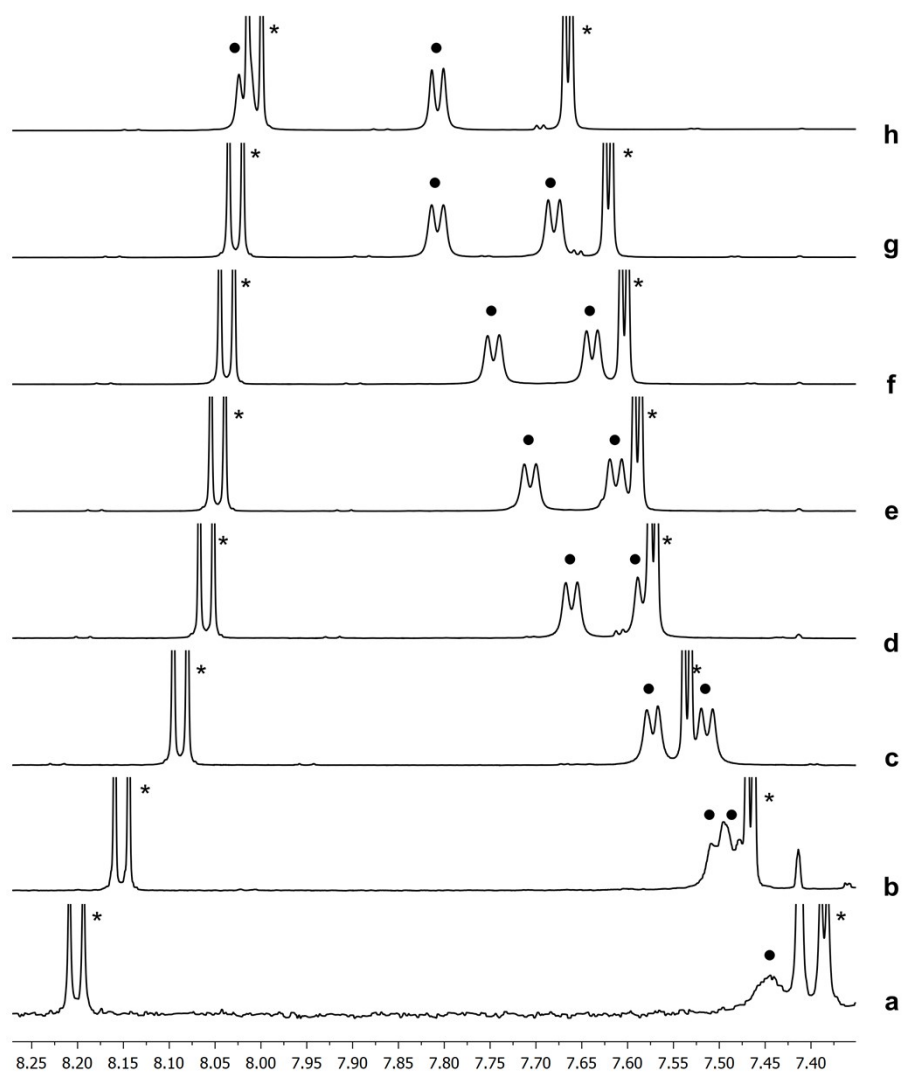

**Figure S1.** Comparison of  $^1\text{H}$  NMR (600 MHz, 25  $^\circ\text{C}$ ,  $\text{C}_6\text{D}_6$ ) spectral regions corresponding to  $\text{NH}$  proton ( $\text{H}_\text{a}$ ) of racemic **3** in equimolar **3/Qui** mixture at: a) 0.1 mM; b) 1 mM; c) 5 mM; d) 10 mM; e) 15 mM; f) 20 mM; g) 30 mM; h) 60 mM; \*Qui resonance.

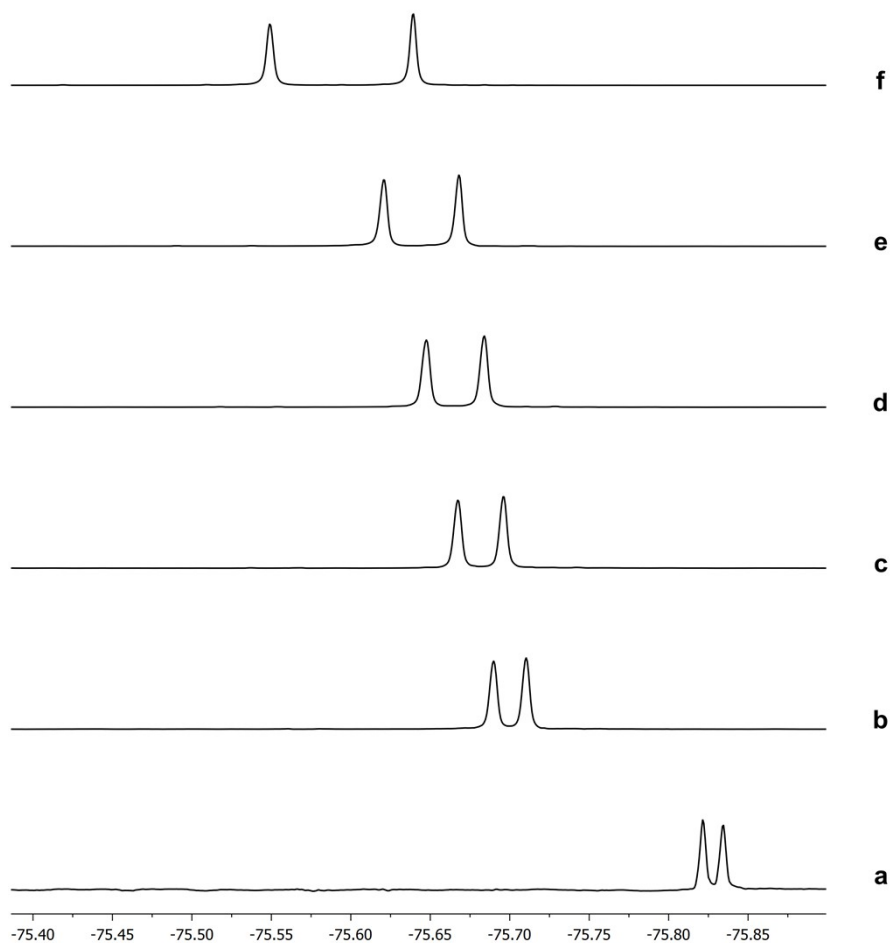

**Figure S2.** Comparison of  $^{19}\text{F}$  NMR (564 MHz, 25 °C,  $\text{C}_6\text{D}_6$ ) spectra of racemic **3** in equimolar **3/Qui** mixture at: a) 0.1 mM; b) 10 mM; c) 15 mM; d) 20 mM; e) 30 mM; f) 60 mM.

**Table S3.**  $^1\text{H}$  NMR chemical shifts ( $\delta$ , ppm) of H1 and H2 protons of **Qui** at variable concentration in the presence of **3** (15 mM) in  $\text{C}_6\text{D}_6$ .

| Qui [mM] | $\delta$ (ppm) |      |
|----------|----------------|------|
|          | H1             | H2   |
| 1.5      | 7.54           | 8.74 |
| 4.5      | 7.51           | 8.73 |
| 7.5      | 7.53           | 8.76 |
| 15       | 7.61           | 8.80 |
| 30       | 7.47           | 8.71 |
| 45       | 7.44           | 8.63 |

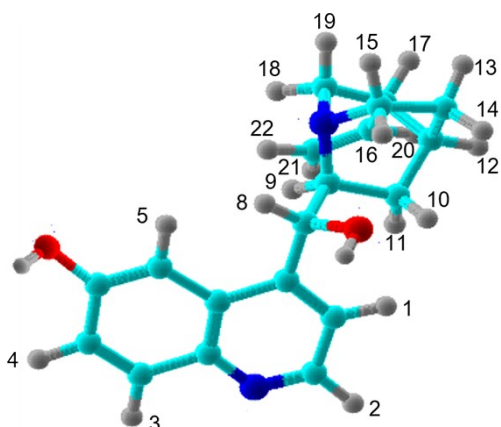

**Figure S3.** Schematic representation of **Qui** (with numbered protons) in the open-like conformation, obtained by detection of ROE effects.

**Table S4.** Comparison of ee (%) determined by gravimetric data and by integration of  $^{19}\text{F}$  NMR signals of the two amino acids mixtures analysed in  $\text{C}_6\text{D}_6$  and  $\text{CDCl}_3$  and the corresponding absolute error.

| N-TFA amino acid      | ee by gravimetric data (%) | ee by NMR integration (%) | absolute error |
|-----------------------|----------------------------|---------------------------|----------------|
| <b>1<sup>a</sup></b>  | 20.18                      | 19.45                     | 0.73           |
| <b>2<sup>a</sup></b>  | 19.96                      | 19.58                     | 0.38           |
| <b>3<sup>b</sup></b>  | -19.92                     | -20.72                    | 0.80           |
| <b>4<sup>b</sup></b>  | -19.70                     | -19.36                    | 0.34           |
| <b>5<sup>b</sup></b>  | 19.76                      | 20.42                     | 0.66           |
| <b>6<sup>b</sup></b>  | 19.90                      | 19.20                     | 0.70           |
| <b>7<sup>b</sup></b>  | 19.22                      | 19.50                     | 0.28           |
| <b>8<sup>a</sup></b>  | 20.12                      | 20.68                     | 0.56           |
| <b>9<sup>b</sup></b>  | -19.22                     | -19.42                    | 0.20           |
| <b>10<sup>a</sup></b> | 20.12                      | 19.40                     | 0.72           |

<sup>a</sup>N-TFA amino acid derivatives (total concentration 60 mM) and Qui (66 mM) mixture in  $\text{CDCl}_3$ .

<sup>b</sup>N-TFA amino acid derivatives (total concentration 40 mM) and Qui (20 mM) mixture in  $\text{C}_6\text{D}_6$ .

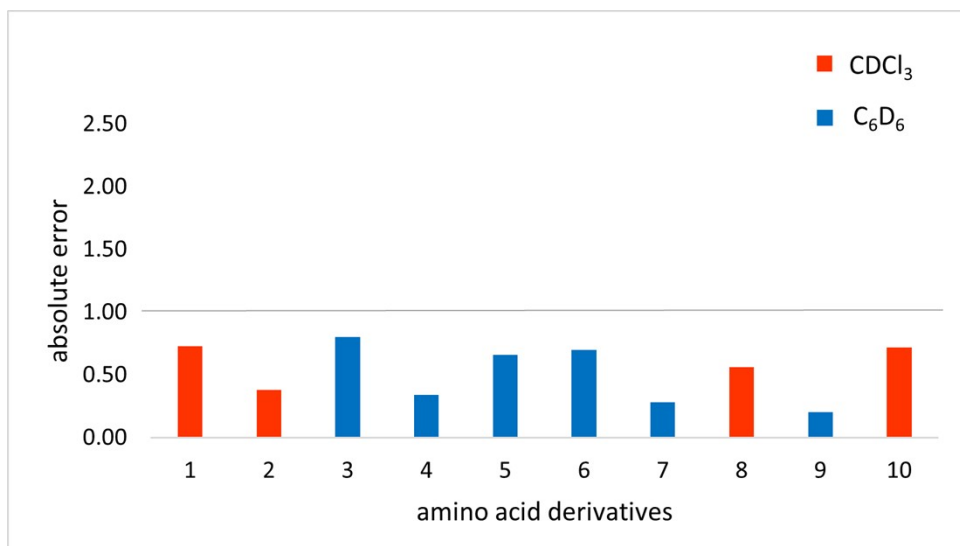

**Figure S4.** Absolute errors of ee in the determination of ee by NMR integration of *N*-TFA-amino acid derivatives in mixtures.

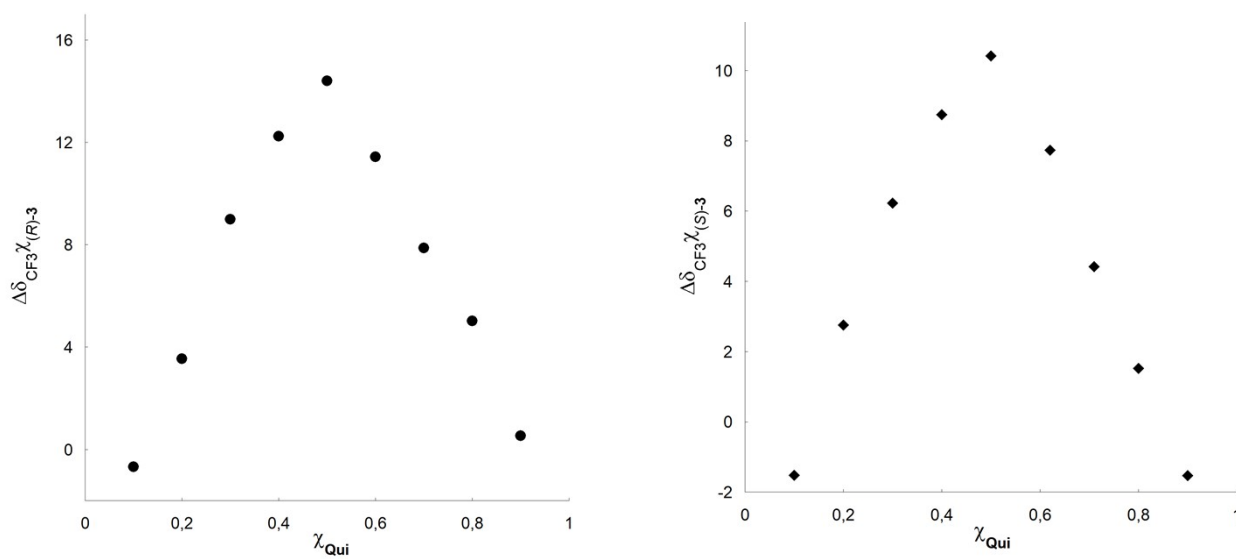

**Figure S5.** Stoichiometry determination based on CF<sub>3</sub> group for (R)-3/Qui (∞) and (S)-3/Qui (\*) complexes.

$$C = \frac{(\delta_{\text{obs}} - \delta_f)(\delta_b - \delta_f)}{K(\delta_b - \delta_{\text{obs}})^2}$$

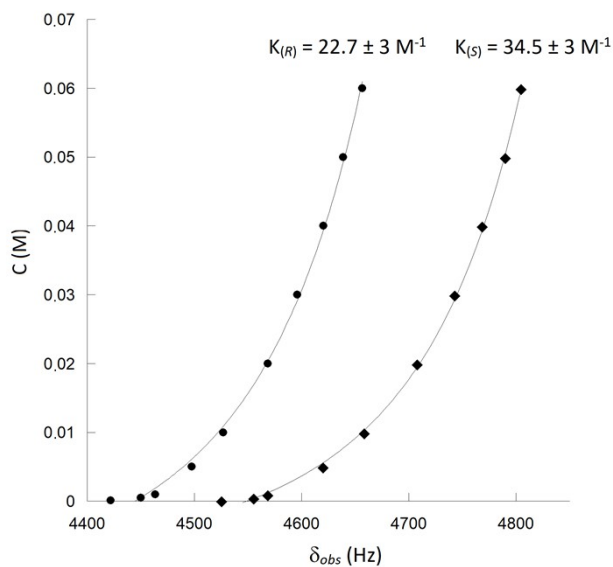

**Figure S6.** Non-linear fitting of dilution data: dependence of NH proton chemical shift ( $\delta_{\text{obs}}$ , Hz) of **3** on the concentration ( $C$ ) in equimolar mixtures (*R*)-**3/Qui** (○) and (*S*)-**3/Qui** (◈):  $\delta_b$  and  $\delta_f$  in equation are the chemical shift in the bound and in the free state, respectively.

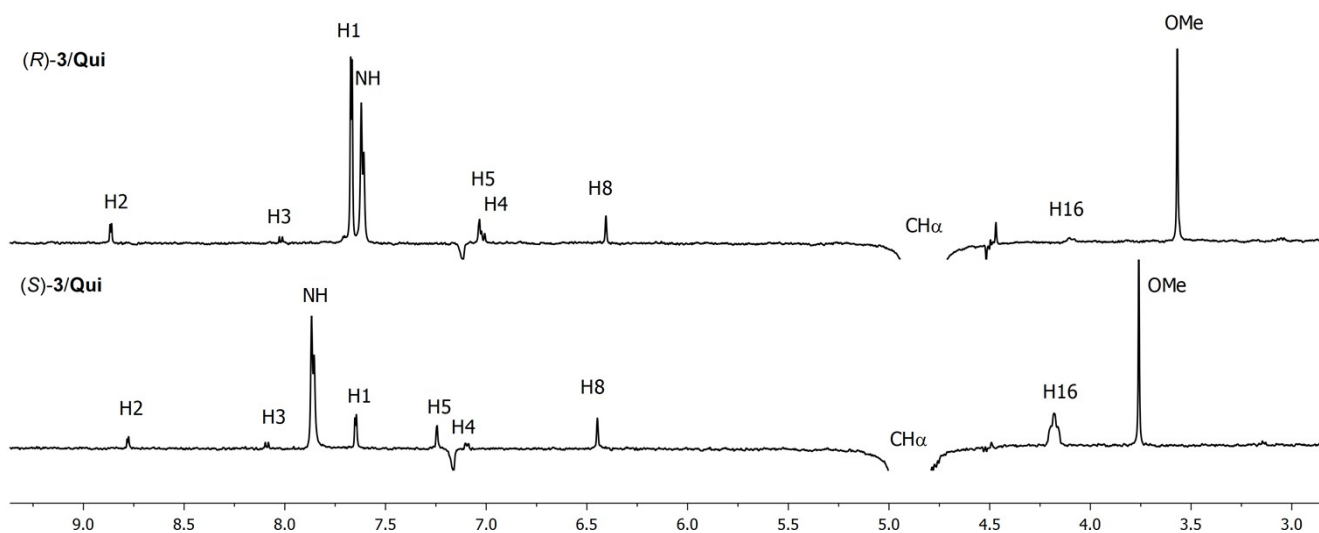

**Figure S7.** Comparison of 1D ROESY spectra of methine proton at the chiral center ( $\text{CH}_\alpha$ ) of **3** (30 mM) in the equimolar mixtures (*R*)-**3/Qui** (top) and (*S*)-**3/Qui** (bottom).



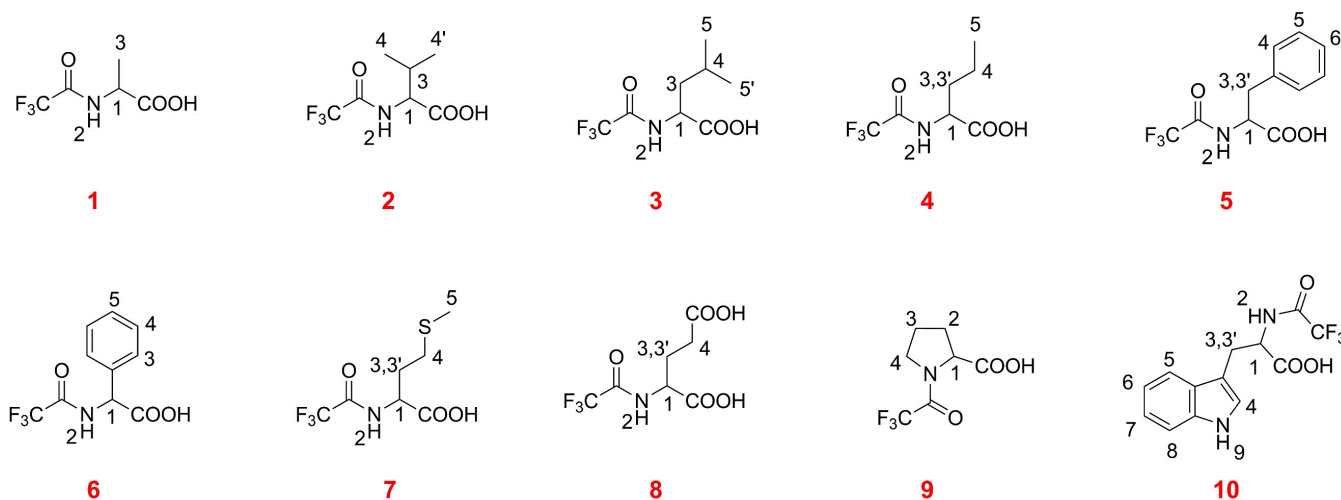

**Figure S8.** *N*-TFA-amino acid derivatives **1-10** with numbered protons.

### NMR characterization of **1-10** and Quinine

*N*-Trifluoroacetylalanine (**1**) (white crystalline solid, 0.879 g, 95%).

$\delta$ H (600 MHz, DMSO, Me<sub>4</sub>Si, 25 °C): 12.89 (1H, br s, COOH); 9.70 (1H, d, H2,  $J_{H2-H1} = 6.7$  Hz); 4.29 (1H, dq, H1,  $J_{H1-H3} = 7.2$  Hz,  $J_{H1-H2} = 6.7$  Hz); 1.33 (3H, d, H3,  $J_{H3-H1} = 7.2$  Hz).

$\delta$ C (150 MHz, DMSO, Me<sub>4</sub>Si, 25 °C): 172.9 (COOH); 156.6 (CONH, q,  $J_{C-F} = 37.2$  Hz); 116.2 (CF<sub>3</sub>, q,  $J_{C-F} = 282.9$  Hz); 48.6 (C1); 16.7 (C3).

*N*-Trifluoroacetylvaline (**2**) (pink pearl crystalline solid, 1.04 g, 97%).

$\delta$ H (600 MHz, CDCl<sub>3</sub>, Me<sub>4</sub>Si, 25 °C): 6.75 (1H, d, H2,  $J_{H2-H1} = 8.4$  Hz); 4.65 (1H, dd, H1,  $J_{H1-H2} = 8.4$  Hz,  $J_{H1-H3} = 4.6$  Hz); 2.35 (1H, m, H-3); 1.02 (3H, d, H4,  $J_{H4-H3} = 6.9$  Hz); 1.00 (3H, d, H4',  $J_{H4'-H3} = 6.9$  Hz).

$\delta$ C (150 MHz, CDCl<sub>3</sub>, Me<sub>4</sub>Si, 25 °C): 174.9 (COOH); 157.2 (CONH, q,  $J_{C-F} = 37.6$  Hz); 115.7 (CF<sub>3</sub>, q,  $J_{C-F} = 288.6$  Hz); 57.1 (C1); 31.2 (C3); 18.8 (C4); 17.0 (C4').

*N*-Trifluoroacetylleucine (**3**) (white crystalline solid, 1.01 g, 89%).

$\delta$ H (600 MHz, CDCl<sub>3</sub>, Me<sub>4</sub>Si, 25 °C): 6.64 (1H, d, H2,  $J_{H2-H1} = 8.0$  Hz); 4.71 (1H, m, H1); 1.70 (2H, m, H3/H3'); 1.82 (1H, m, H4); 0.99 (6H, d, H5/H5',  $J_{H5/5'-H4} = 6.3$  Hz).

$\delta$ C (150 MHz, CDCl<sub>3</sub>, Me<sub>4</sub>Si, 25 °C): 174.8 (COOH); 156.9 (CONH, q,  $J_{C-F} = 37.5$  Hz); 115.6 (CF<sub>3</sub>, q,  $J_{C-F} = 288.9$  Hz); 50.9 (C1); 41.1 (C3); 24.9 (C4); 22.6 (C5); 21.8 (C5').

*N*-Trifluoroacetylnorvaline (**4**) (white crystalline solid, 0.905 g, 85%).

$\delta$ H (600 MHz, CDCl<sub>3</sub>, Me<sub>4</sub>Si, 25 °C): 6.75 (1H, d, H2,  $J_{H2-H1} = 7.6$  Hz); 4.69 (1H, dt, H1,  $J_{H1-H2} = 7.6$  Hz;  $J_{H1-H3} = J_{H1-H3'} = 5.4$  Hz); 1.98 (1H, m, H3); 1.80 (1H, m, H3'); 1.41 (2H, m, H4); 0.97 (3H, t, H5,  $J_{H5-H4} = 7.4$  Hz).

$\delta$ C (150 MHz, CDCl<sub>3</sub>, Me<sub>4</sub>Si, 25 °C): 175.4 (COOH); 156.9 (CONH, q,  $J_{C-F} = 38.0$  Hz); 115.6 (CF<sub>3</sub>, q,  $J_{C-F} = 286.7$  Hz); 52.7 (C1); 33.8 (C3); 18.1 (C4); 13.5 (C5).

*N*-Trifluoroacetylphenylalanine (**5**) (white crystalline solid, 0.992 g, 76%).

$\delta$ H (600 MHz, CDCl<sub>3</sub>, Me<sub>4</sub>Si, 25 °C): 7.33 (2H, t, H<sub>5</sub>,  $J_{H_5-H_6} = J_{H_5-H_4} = 7.0$  Hz); 7.30 (1H, t, H<sub>6</sub>,  $J_{H_6-H_5} = 7.0$  Hz); 7.14 (2H, d, H<sub>4</sub>,  $J_{H_4-H_5} = 7.0$  Hz); 6.71 (1H, d, H<sub>2</sub>,  $J_{H_2-H_1} = 6.9$  Hz); 4.94 (1H, dt, H<sub>1</sub>,  $J_{H_1-H_2} = 6.9$  Hz,  $J_{H_1-H_3} = J_{H_1-H_3'} = 5.6$  Hz); 3.30 (1H, dd, H<sub>3</sub>,  $J_{H_3-H_3'} = 14.2$  Hz,  $J_{H_3-H_1} = 5.6$  Hz); 3.21 (1H, dd, H<sub>3'</sub>,  $J_{H_3'-H_3} = 14.2$  Hz,  $J_{H_3'-H_1} = 5.6$  Hz).

$\delta$ C (150 MHz, CDCl<sub>3</sub>, Me<sub>4</sub>Si, 25 °C): 174.1 (COOH); 156.7 (CONH, q,  $J_{C-F} = 38.2$  Hz); 134.2 (C-C4); 129.2 (C4); 129.0 (C5); 127.8 (C6); 115.5 (CF<sub>3</sub>, q,  $J_{C-F} = 287.6$  Hz); 53.2 (C1); 36.9 (C3).

*N*-Trifluoroacetylphenylglycine (**6**) (white crystalline solid, 1.20 g, 97%).

$\delta$ H (600 MHz, CDCl<sub>3</sub>, Me<sub>4</sub>Si, 25 °C): 7.33 (5H, m, H<sub>3</sub>, H<sub>4</sub>, H<sub>5</sub>); 7.23 (1H, d, H<sub>2</sub>,  $J_{H_2-H_1} = 7.0$  Hz); 5.59 (1H, d, H<sub>1</sub>,  $J_{H_1-H_2} = 7.0$  Hz).

$\delta$ C (150 MHz, CDCl<sub>3</sub>, Me<sub>4</sub>Si, 25 °C): 173.1 (COOH); 156.4 (CONH, q,  $J_{C-F} = 38.1$  Hz); 133.8 (C-C3); 129.6/129.3/127.2 (C3, C4, C5); 115.5 (CF<sub>3</sub>, q,  $J_{C-F} = 279.5$  Hz); 56.4 (C1).

*N*-Trifluoroacetylmethionine (**7**) (white crystalline solid, 0.981 g, 80 %).

$\delta$ H (600 MHz, CDCl<sub>3</sub>, Me<sub>4</sub>Si, 25 °C): 7.23 (1H, d, H<sub>2</sub>,  $J_{H_2-H_1} = 7.5$  Hz); 4.82 (1H, dt, H<sub>1</sub>,  $J_{H_1-H_2} = 7.5$  Hz,  $J_{H_1-H_3} = J_{H_1-H_3'} = 5.4$  Hz); 2.60 (2H, m, H<sub>4</sub>); 2.29 (1H, m, H<sub>3</sub>); 2.20 (1H, m, H<sub>3'</sub>); 2.12 (3H, s, H<sub>5</sub>).  $\delta$ C (150 MHz, CDCl<sub>3</sub>, Me<sub>4</sub>Si, 25 °C): 174.2 (COOH); 157.1 (CONH, q,  $J_{C-F} = 38.2$  Hz); 115.5 (CF<sub>3</sub>, q,  $J_{C-F} = 288.8$  Hz); 51.9 (C1); 30.2 (C3); 29.8 (C4); 15.5 (C5).

*N*-Trifluoroacetylglutamic acid (**8**) (white crystalline solid, 0.827 g, 68%).

$\delta$ H (600 MHz, DMSO, Me<sub>4</sub>Si, 25 °C): 12.60 (2H, br s, COOH); 9.67 (1H, d, H<sub>2</sub>,  $J_{H_2-H_1} = 7.9$  Hz); 4.27 (1H, m, H<sub>1</sub>); 2.27 (2H, t, H-4,  $J_{H_4-H_3} = J_{H_4-H_3'} = 7.3$  Hz); 2.06 (1H, m, H<sub>3</sub>); 1.87 (1H, m, H<sub>3'</sub>).

$\delta$ C (150 MHz, DMSO, Me<sub>4</sub>Si, 25 °C): 174.0 (C1-COOH); 172.1 (C4-COOH); 157.0 (CONH, q,  $J_{C-F} = 36.4$  Hz); 116.2 (CF<sub>3</sub>, q,  $J_{C-F} = 289.0$  Hz); 52.3 (C1); 30.4 (C4); 25.6 (C3).

*N*-Trifluoroacetylproline (**9**) (white crystalline solid, 0.897 g, 85%).

$\delta$ H (600 MHz, CDCl<sub>3</sub>, Me<sub>4</sub>Si, 25 °C): 4.72 (1H, br d, H<sub>1<sub>syn</sub></sub>,  $J = 8.0$  Hz); 4.59 (1H, dd, H<sub>1<sub>anti</sub></sub>,  $J = 8.0$  Hz,  $J = 2.9$  Hz); 3.89-3.62 (2H, m, H<sub>4</sub>); 2.40-1.90 (4H, m, H<sub>2</sub>/H<sub>3</sub>).

$\delta$ C (150 MHz, CDCl<sub>3</sub>, Me<sub>4</sub>Si, 25 °C): 176.2 and 175.8 (COOH); 156.2 and 155.7 (CONH, q,  $J_{C-F} = 37.9$  Hz); 116.0 (CF<sub>3</sub>, q,  $J_{C-F} = 287.0$  Hz); 60.1 and 59.0 (C1); 48.0 and 47.3 (C4); 31.6, 28.6, 25.0, and 21.1 (C3 and C2).

*N*-Trifluoroacetyltryptophan (**10**) (light brown crystalline solid, 1.30 g, 87%).

$\delta$ H (600 MHz, DMSO, Me<sub>4</sub>Si, 25 °C): 13.06 (1H, s, H<sub>9</sub>); 10.83 (1H, s, COOH); 9.73 (1H, d, H<sub>2</sub>,  $J_{H_2-H_1} = 8.0$  Hz); 7.53 (1H, d, H<sub>8</sub>,  $J_{H_8-H_7} = 7.6$  Hz); 7.32 (1H, d, H<sub>5</sub>,  $J_{H_5-H_6} = 7.6$  Hz); 7.12 (1H, s, H<sub>4</sub>); 7.05 (1H, t, H-7,  $J_{H_7-H_8} = J_{H_7-H_6} = 7.6$  Hz); 6.97 (1H, t, H<sub>6</sub>,  $J_{H_6-H_7} = J_{H_6-H_5} = 7.6$  Hz); 4.49 (1H, dt, H<sub>1</sub>,  $J_{H_1-H_2} = 8.0$  Hz,  $J_{H_1-H_3} = J_{H_1-H_3'} = 4.2$  Hz); 3.29 (1H, dd, H<sub>3</sub>,  $J_{H_3-H_3'} = 14.9$  Hz;  $J_{H_3-H_1} = 4.2$  Hz); 3.15 (1H, dd, H<sub>3'</sub>,  $J_{H_3'-H_3} = 14.9$  Hz;  $J_{H_3'-H_1} = 4.2$  Hz).  $\delta$ C (150 MHz, DMSO, Me<sub>4</sub>Si, 25 °C): 172.2 (COOH); 156.8 (CONH, q,  $J_{C-F} = 36.1$  Hz); 136.5 (C-C8); 127.3 (C-C5); 124.0 (C4); 121.5 (C7); 118.9 (C6); 118.5 (C8); 116.2 (CF<sub>3</sub>, q,  $J_{C-F} = 288.9$  Hz); 111.9 (C5); 110.1 (C4-C); 54.1 (C1); 26.5 (C3/C3').

## Qui

$\delta$ H (600 MHz, CDCl<sub>3</sub>, Me<sub>4</sub>Si, 25 °C): 8.68 (1H, d, H2,  $J_{H2-H1} = 4.5$  Hz); 7.97 (1H, d, H3,  $J_{H3-H4} = 8.5$  Hz); 7.51 (1H, d, H1,  $J_{H1-H2} = 4.5$  Hz); 7.31 (1H, dd, H4,  $J_{H4-H3} = 8.5$  Hz,  $J_{H4-H5} = 2.7$  Hz,); 7.22 (1H, d, H5,  $J_{H5-H4} = 2.7$  Hz,); 5.73 (1H, ddd, H20,  $J_{H20-H22} = 17.1$  Hz,  $J_{H20-H21} = 10.4$  Hz,  $J_{H20-H17} = 7.5$  Hz); 5.61 (1H, br s, H8); 4.96 (1H, dt, H22,  $J_{H22-H20} = 17.1$  Hz,  $J_{H22-H21} = J_{H22-H17} = 1.1$  Hz); 4.92 (1H, dt, H21,  $J_{H21-H20} = 10.4$  Hz,  $J_{H21-H22} = J_{H21-H17} = 1.1$  Hz); 3.87 (3H, s, OMe); 3.50 (1H, m, H16); 3.30 (1H, s, OH); 3.16 (1H, m, H9); 3.11 (1H, dd, H19,  $J_{H19-H18} = 14.0$  Hz,  $J_{H19-H17} = 10.0$  Hz); 2.71 (1H, m, H18); 2.69 (1H, m, H15); 2.30 (1H, m, H17); 1.84 (1H, m, H12); 1.76 (1H, m, H10); 1.75 (1H, m, H14); 1.56 (1H, m, H13); 1.53 (1H, m, H11).

$\delta$ C (150 MHz, CDCl<sub>3</sub>, Me<sub>4</sub>Si, 25 °C): 157.7 (COMe); 147.6 (C-C8); 147.0 (C2); 144.3 (C-C3); 141.4 (C20); 131.6 (C3); 126.5 (C-C5); 121.6 (C4); 118.5 (C1); 114.5 (C22/21); 101.4 (C5); 71.9 (C8); 60.4 (C9); 56.8 (C18/19); 56.0 (OMe); 43.3 (C15/16); 39.9 (C17); 27.8 (C12); 27.4 (C10/11); 21.7 (C13/14).

$\delta$ H (600 MHz, C<sub>6</sub>D<sub>6</sub>, Me<sub>4</sub>Si, 25 °C): 8.58 (1H, d, H2,  $J_{H2-H1} = 4.3$  Hz); 8.15 (1H, d, H3,  $J_{H3-H4} = 9.3$  Hz); 7.39 (1H, d, H5,  $J_{H5-H4} = 2.9$  Hz); 7.28 (1H, d, H-1,  $J_{H1-H2} = 4.3$  Hz); 7.15 (1H, dd, H4,  $J_{H4-H3} = 9.3$  Hz,  $J_{H4-H5} = 2.9$  Hz); 5.49 (1H, ddd, H20,  $J_{H20-H22} = 17.2$  Hz,  $J_{H20-H21} = 10.5$  Hz,  $J_{H20-H17} = 8$  Hz); 5.35 (1H, br s, H8); 4.82 (1H, dt, H22,  $J_{H22-H20} = 17.2$  Hz,  $J_{H22-H21} = J_{H22-H17} = 1.5$  Hz); 4.77 (1H, dt, H21,  $J_{H21-H20} = 10.5$  Hz,  $J_{H21-H22} = J_{H21-H17} = 1.5$  Hz); 3.48 (3H, s, OMe); 3.40 (1H, m, H16); 3.09 (1H, m, H9); 2.84 (1H, dd, H19,  $J_{H19-H18} = 13.8$  Hz,  $J_{H19-H17} = 10.1$  Hz); 2.50 (1H, m, H18); 2.45 (1H, m, H15); 1.94 (1H, m, H17); 1.77 (1H, m, H11); 1.58 (1H, m, H12); 1.58 (1H, m, H14); 1.46 (1H, m, H10); 1.17 (1H, m, H13).
